# Supplementary material
Source: Springer Nature journal article supplement (https://www.springermedizin.de/resource/supplementary/12885_2012_3269_MOESM1_ESM.pdf/9463298)
Supplement: MOESM1 [file 9463298]

**ADDITIONAL FILE**

**The mitochondrial transporter SLC25A43 is frequently deleted and may influence cell proliferation in HER2-positive breast tumours**

Elisabet Tina<sup>1,2,4,\*</sup>, Breezy Malakkaran Lindqvist<sup>2,4</sup>, Marike Gabrielson<sup>2,4</sup>, Zelmina Lubovac<sup>3</sup>, Pia Wegman<sup>2</sup> and Sten Wingren<sup>2</sup>

**Additional file Table 1** Primer sequences used for PCR in the mutation analysis of the *SLC25A43* gene.

| <b>Exon</b> | <b>Forward (5'→3')</b>   | <b>Reverse (5'→3')</b>   |
|-------------|--------------------------|--------------------------|
| 1A          | GCCAGGCTAGGGCGTAGA       | CTTTGGCCGCCTGTCAGT       |
| 1B          | ACTGACAGGCGGCCAAAG       | GGCTCTTACTTGCGGTAGGC     |
| 2           | GCCTTTCCCCCTATTTTCTC     | GGACAAGGTGAAAAGGTCCA     |
| 3           | CTTCTCCCTGGCCTTGTTT      | CCCCACTCTGATAACTCCTCA    |
| 4           | TGGGAGCATTCACAGGAAGT     | GGCACCATTCTTACCCTCAA     |
| 5           | TCCCAGCTTCTGTTTCCTGT     | GAGGCTGGTGGCTCTTCTC      |
| 6           | TTGATTTTCATTTTGGTTTAAACA | TGAGGCTACATTTATCTGTGATTG |

**Additional file Table 2** Genomic positions and size of deletion at Xq24 in HER2-positive breast cancer cases as revealed by the whole genome array (Based on *Homo sapiens* build 37.3).

| <b>Patient ID</b> | <b>Start</b> | <b>Size loss<br/>(kBp)</b> |
|-------------------|--------------|----------------------------|
| 2                 | 118504.82    | 110.559                    |
| 3                 | 118148.23    | 551.091                    |
| 5                 | 118419.195   | 280.126                    |
| 6                 | 118504.82    | 110.559                    |
| 8                 | 118419.195   | 196.184                    |
| 9                 | 118504.82    | 110.559                    |
| 10                | 118504.82    | 110.559                    |
| 11                | 118348.041   | 351.28                     |
| 12                | 118419.195   | 196.184                    |
| 13                | 118504.82    | 110.559                    |
| 14                | 118504.82    | 110.559                    |
| 15                | 118419.195   | 280.126                    |
| 16                | 118504.82    | 110.559                    |
| 17                | 118504.82    | 110.559                    |
| 19                | 118504.82    | 110.559                    |
| 20                | 118504.82    | 110.559                    |
| 21                | 118419.195   | 196.184                    |
| 22                | 117442.441   | 1388.026                   |
| 23                | 118419.195   | 280.126                    |
| 24                | 118504.82    | 194.501                    |

**Additional file Table 3** List of genes deleted at Xq24 in HER2-positive breast cancer as revealed by the whole genome array.

| <b>No of Patients</b> | <b>Gene in the deleted locus</b> | <b>References*</b> |
|-----------------------|----------------------------------|--------------------|
| 20                    | <i>SLC25A43</i>                  | -                  |
| 20                    | <b><u><i>SLC25A5</i></u></b>     | [1, 2]             |
| 5                     | <i>CXorf56</i>                   | -                  |
| 3                     | <b><u><i>PGRMC1</i></u></b>      | [3, 4]             |
| 2                     | <b><i>KIAA1210</i></b>           | [5]                |
| 2                     | <i>LONRF3</i>                    | -                  |
| 1                     | <b><i>ZCCHC12</i></b>            | [6]                |
| 1                     | <b><i>IL13RA1</i></b>            | [7, 8]             |
| 1                     | <b><i>DOCK11</i></b>             | [9]                |
| 1                     | <i>WDR44</i>                     | -                  |
| 1                     | <i>UBE2A</i>                     | -                  |
| 1                     | <b><i>NKRF</i></b>               | [10]               |
| 1                     | <i>MIR766</i>                    | -                  |
| 1                     | <b><i>SEPT6</i></b>              | [11, 12]           |

\*References for the genes that are previously implicated in **breast cancer** and **other cancers**

## Additional file References

1. Jang JY, Choi Y, Jeon YK, Kim CW: **Suppression of adenine nucleotide translocase-2 by vector-based siRNA in human breast cancer cells induces apoptosis and inhibits tumor growth in vitro and in vivo.** *Breast Cancer Res* 2008, **10**(1):R11.
2. Chevrollier A, Loiseau D, Reynier P, Stepien G: **Adenine nucleotide translocase 2 is a key mitochondrial protein in cancer metabolism.** *Biochim Biophys Acta* 2010, **1807**(6):562-567.
3. Neubauer H, Yang Y, Seeger H, Fehm T, Cahill MA, Tong X, Ruan X, Mueck AO: **The presence of a membrane-bound progesterone receptor sensitizes the estradiol-induced effect on the proliferation of human breast cancer cells.** *Menopause* 2011, **18**(8):845-850.
4. Craven RJ: **PGRMC1: a new biomarker for the estrogen receptor in breast cancer.** *Breast Cancer Res* 2008, **10**(6):113.
5. Vanaja DK, Ballman KV, Morlan BW, Cheville JC, Neumann RM, Lieber MM, Tindall DJ, Young CY: **PDLIM4 repression by hypermethylation as a potential biomarker for prostate cancer.** *Clin Cancer Res* 2006, **12**(4):1128-1136.
6. Li QL, Chen FJ, Lai R, Guo ZM, Luo R, Yang AK: **ZCCHC12, a potential molecular marker of papillary thyroid carcinoma: a preliminary study.** *Med Oncol* 2011.
7. Serão NV, Delfino KR, Southey BR, Beever JE, Rodriguez-Zas SL: **Cell cycle and aging, morphogenesis, and response to stimuli genes are individualized biomarkers of glioblastoma progression and survival.** *BMC Med Genomics* 2011, **4**:49.
8. Staeger MS, Banning-Eichenseer U, Weissflog G, Volkmer I, Burdach S, Richter G, Mauz-Körholz C, Föll J, Körholz D: **Gene expression profiles of Hodgkin's lymphoma cell lines with different sensitivity to cytotoxic drugs.** *Exp Hematol* 2008, **36**(7):886-896.
9. Almstrup K, Leffers H, Lothe RA, Skakkebaek NE, Sonne SB, Nielsen JE, Rajpert-De Meyts E, Skotheim RI: **Improved gene expression signature of testicular carcinoma in situ.** *Int J Androl* 2007, **30**(4):292-302; discussion 303.
10. Lu Z, Li Y, Takwi A, Li B, Zhang J, Conklin DJ, Young KH, Martin R: **miR-301a as an NF- $\kappa$ B activator in pancreatic cancer cells.** *EMBO J* 2011, **30**(1):57-67.
11. Cerveira N, Santos J, Teixeira MR: **Structural and expression changes of septins in myeloid neoplasia.** *Crit Rev Oncog* 2009, **15**(1-2):91-115.
12. Cerveira N, Bizarro S, Teixeira MR: **MLL-SEPTIN gene fusions in hematological malignancies.** *Biol Chem* 2011, **392**(8-9):713-724.
